# Supplementary material for: Vamorolone, a dissociative steroidal compound, reduces pro-inflammatory cytokine expression in glioma cells and increases activity and survival in a murine model of cortical tumor
Source: PubMed Central journal article supplement (PMC5354737; doi:10.18632/oncotarget.14070), 2016-12-21
Supplement: oncotarget-08-9366-s001.pdf [file oncotarget-08-9366-s001.pdf]

## Vamorolone, a dissociative steroidal compound, reduces pro-inflammatory cytokine expression in glioma cells and increases activity and survival in a murine model of cortical tumor

### Supplementary Materials

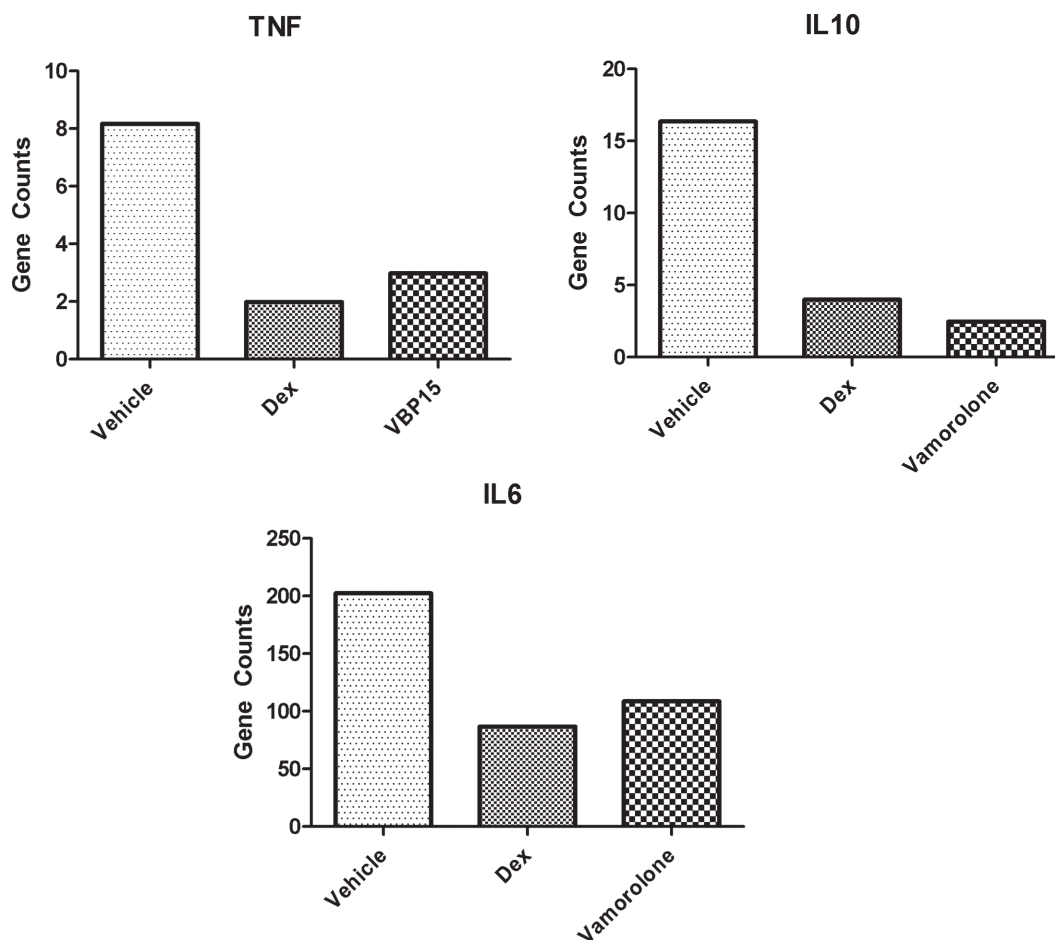

**Supplementary Figure S1: Dexamethasone and vamorolone decrease inflammatory cytokines associated with NF- $\kappa$ B pathway *in vitro*.** Tumor cells were expanded in culture and treated with vehicle (DMSO, control), dexamethasone (Dex) or vamorolone. mRNA profiling using NanoString mouse inflammatory assay was done using mRNA extracted at 6, 12, 18, and 22 hours of drug exposure. The expression levels of proinflammatory signals including TNF (top left panel), IL6 (top right panel) and IL10 were decreased compared to the vehicle treated cells.

**Supplementary Table S1: Measures of treatment groups to assess the gluco-corticoid mediated side effects in mice**

| Measure            | Vehicle     | Dexamethasone | Vamorolone  | Overall <i>p</i> -value | Significantly different means                                                                                                 |
|--------------------|-------------|---------------|-------------|-------------------------|-------------------------------------------------------------------------------------------------------------------------------|
|                    | Mean ± SD   | Mean ± SD     | Mean ± SD   |                         |                                                                                                                               |
| Body length (cm)   | 10.1 ± 0.3  | 8.9 ± 0.4     | 9.6 ± 0.5   | 0.0007                  | Vehicle vs. dex. ( <i>p</i> = 0.001)<br>Dex. vs. Vamorolone ( <i>p</i> = 0.041)                                               |
| Spleen weight (g)  | 0.11 ± 0.01 | 0.03 ± 0.01   | 0.06 ± 0.01 | < 0.001                 | Vehicle vs. dex. ( <i>p</i> < 0.001)<br>Vehicle vs. Vamorolone ( <i>p</i> < 0.001)<br>Dex. vs. Vamorolone ( <i>p</i> = 0.001) |
| Spleen length (cm) | 1.6 ± 0.1   | 1.1 ± 0.2     | 1.4 ± 0.1   | < 0.001                 | Vehicle vs. dex. ( <i>p</i> < 0.001)<br>Vehicle vs. Vamorolone ( <i>p</i> = 0.002)<br>Dex. vs. Vamorolone ( <i>p</i> < 0.001) |
| Tibia length (cm)  | 2.2 ± 0.1   | 1.6 ± 0.1     | 1.9 ± 0.1   | < 0.001                 | Vehicle vs. dex. ( <i>p</i> < 0.001)<br>Vehicle vs. Vamorolone ( <i>p</i> < 0.001)<br>Dex. vs. Vamorolone ( <i>p</i> = 0.021) |

All measures were taken at the end point. All measures are found to be normally distributed and one-way ANOVA with post-hoc pair-wise comparisons was performed on these measures and adjustment of *p*-values for multiple comparisons was done using the Sidak method.

**Supplementary Table S2: Schematic to measure the activity using VersaMax open field activity monitoring system**

| <b>Acclimation:</b>     |                       |                       |                           |                           |                         |
|-------------------------|-----------------------|-----------------------|---------------------------|---------------------------|-------------------------|
| Step                    | Mice in the test room |                       | Mice in the test chambers |                           | Mice back into the cage |
| Time                    | 10 minutes            |                       | 60 minutes                |                           | Until next day          |
| <b>Data Collection:</b> |                       |                       |                           |                           |                         |
| Step                    | Mice in the test room | Enter data parameters | Pre beam check            | Mice in the test chambers | Mice back into the cage |
| Time                    | 10 minutes            | N/A                   | N/A                       | 60 minutes                | Until next day          |

Mice were acclimatized to the system one week prior to the activity measurement (top panel). Data was collected for 4 consecutive days (bottom panel). The system collects six readings in one hour (1 reading every 10 minutes).

**Supplementary Table S3: Horizontal activity analyses across the groups**

| Measurement         | Comparison groups      | Group effect    |               | Measurement Time effect |               | Day effect       | Overall r <sup>2</sup> of model |
|---------------------|------------------------|-----------------|---------------|-------------------------|---------------|------------------|---------------------------------|
|                     |                        | <i>p</i> -value | $\beta$ coef. | <i>p</i> -value         | $\beta$ coef. | <i>p</i> -value* |                                 |
| Horizontal activity | Vamorolone vs. Dex     | 0.61            | -99.1         | 0.019                   | -442.1        | 0.25             | 0.689                           |
|                     | Vamorolone vs. Vehicle | 0.52            | -550.9        | 0.012                   | -442.1        | 0.030            | 0.863                           |
|                     | Dex vs. Vehicle        | 0.16            | -664.6        | 0.06                    | -668.8        | 0.88             | 0.734                           |

Activity measures compared across three groups dexamethasone (Dex), vamorolone and vehicle. Group (vamorolone vs Dex, vamorolone vs vehicle, Dex vs vehicle), Measurement time (pre-treatment to post-treatment), day (four day measurements).
